# Supplementary material for: Safety, tolerability, and immune-biomarker profiling for year-long sargramostim treatment of Parkinson's disease
Source: PubMed Central journal article supplement — eBioMedicine. 2021 May 14;67:103380. doi: 10.1016/j.ebiom.2021.103380 (PMC8138485; doi:10.1016/j.ebiom.2021.103380), 2021-05-14
Supplement: mmc2.pdf [file mmc2.pdf]

I am giving my consent to include my name in the acknowledgement section of the manuscript entitled "Safety, tolerability and immune-biomarker profiling for year-long sargramostim treatment of Parkinson's disease".



2.24.21

Farah Shahjin  
Ph.D Candidate  
Department of Pharmacology and Experimental Neuroscience  
University of Nebraska Medical Center
