# Supplementary material for: Safety, tolerability, and immune-biomarker profiling for year-long sargramostim treatment of Parkinson's disease
Source: PubMed Central journal article supplement — eBioMedicine. 2021 May 14;67:103380. doi: 10.1016/j.ebiom.2021.103380 (PMC8138485; doi:10.1016/j.ebiom.2021.103380), 2021-05-14
Supplement: mmc4.pdf [file mmc4.pdf]

February 24, 2021

Katherine Olson, Ph.D.  
Department of Pharmacology and Experimental Neuroscience  
University of Nebraska Medical Center  
985800 Nebraska Medical Center  
Omaha, NE 68198-5800

Dear Dr. Olson:

I agree to having my name listed in the acknowledgments section of your upcoming manuscript regarding the Leukine clinical trial.

Sincerely,



Kenneth A. Follett, MD PhD  
Professor Emeritus  
Department of Neurosurgery
