# Supplementary material for: Safety, tolerability, and immune-biomarker profiling for year-long sargramostim treatment of Parkinson's disease
Source: PubMed Central journal article supplement — eBioMedicine. 2021 May 14;67:103380. doi: 10.1016/j.ebiom.2021.103380 (PMC8138485; doi:10.1016/j.ebiom.2021.103380), 2021-05-14
Supplement: mmc7.pdf [file mmc7.pdf]

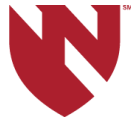

2/28/2021

Good afternoon,

Thank you for the offer to recognize me in the acknowledgements section for the Leukine trial. You are listed in our acknowledgements and the journal requires written consent for us to list you. I do consent to be specifically acknowledged in this work, as outlined in the acknowledgement section below.

#### Acknowledgements

“The authors would like to thank the participants and family members for their willingness to participate and dedication to the study as well as those who supported our research efforts. We greatly appreciate the time and effort put in by Jonathan Beck, Pharm D, Director of Investigational Drug Services, who graciously served as the clinical pharmacist, and the Great Plains Center for Clinical and Translational Research and Red Cross Apheresis Center staff for assistance with subject scheduling and collecting subject samples. We also thank the members of our data safety monitoring board including Kenneth Follett, MD, Daniel Murman, MD, Gleb Haynatzki, PhD, Christopher Kratochvil, MD, and R. Gregory Bociek, MD for review and discussion of the work, as well as Farah Shahjin and Jatin Machhi for assistance with proteomic sample preparation. The authors would also like to thank the UNMC Flow Cytometry Research Facility for exceptional flow cytometric analysis and support, the INBRE grant from NIH (2P20GM103427) for supporting a site license to EndNote software, the UNMC elutriation core for isolation of subject monocyte and lymphocyte populations, and the UNMC Epigenomics Core Facility for assessing methylation status of isolated DNA samples. The authors would also like to acknowledge the professional services of UNMC Mass Spectrometry & Proteomics Core and Bioinformatics and Systems Biology Core for assistance with proteomic analysis. Lastly, we express our gratitude to the funding sources that made this work possible, Partner Therapeutics, the Carol Swarts Neuroscience Research Laboratory, the Frances and Louis Blumkin Foundation, the Nebraska Neuroscience Alliance Endowed Funds, and the Robert Eisenberg Parkinson’s Research Fund.”

Thank you

A handwritten signature in black ink, appearing to read 'C. Kratochvil'.

Christopher J. Kratochvil, M.D.  
Associate Vice Chancellor for Clinical Research, UNMC  
Vice President for Research, Nebraska Medicine  
Chief Medical Officer, UNeHealth
